# Supplementary material for: Expression of the aryl hydrocarbon receptor contributes to the establishment of intestinal microbial community structure in mice
Source: PubMed Central journal article supplement (PMC5034278; doi:10.1038/srep33969), 2016-09-23
Supplement: srep33969-s1.pdf [file srep33969-s1.pdf]

1 **Expression of the aryl hydrocarbon receptor contributes to the establishment of**  
2 **intestinal microbial community structure in mice.**

3 Iain A. Murray<sup>1</sup>, Robert G. Nichols<sup>1</sup>, Limin Zhang<sup>1,2</sup>, Andrew D. Patterson<sup>1</sup> and Gary H.  
4 Perdew<sup>1\*</sup>.

5

6 <sup>1</sup>Center for Molecular Toxicology & Carcinogenesis Department of Veterinary and  
7 Biomedical Sciences, The Pennsylvania State University, University Park, PA-16802,  
8 USA

9 <sup>2</sup>Huck Institutes of the Life Sciences. The Pennsylvania State University, University  
10 Park, PA-16802, USA.

11

12

13 **Supplementary information**

14 **Quantitative PCR oligonucleotide sequences**

| <b>Target</b>             | <b>Forward (5'-3')</b>   | <b>Reverse (5'-3')</b>   |
|---------------------------|--------------------------|--------------------------|
| <i>Saa1</i>               | acaccaggatgaagctactacca  | cccttggaagcctcgtgaacaaa  |
| <i>Saa2</i>               | agctggctggaaagatggagacaa | tgtcctctgccgaagaattcctga |
| <i>Saa3</i>               | atgccagagaggctgttcagaagt | tatcttttaggcaggccagcaggt |
| <i>Cd14</i>               | ttcagaatctaccgacctggagc  | caattgaaagcgtggaccaa     |
| <i>Il17a</i>              | cagactacctcaaccgttcac    | tccagtttccctccgcattga    |
| <i>Lcn2</i>               | atttccagagtgaactggc      | aatgtcacctccatcctggt     |
| <i>Rpl13a</i>             | ttcggtgaagcctaccagaaagt  | gcatcttggccttttccgtt     |
| <i>16S Eubacteria</i>     | actcctacgggaggcagcag     | attaccgcggtgctgg         |
| <i>16S Firmicutes</i>     | gcagtagggaatcttccg       | attaccgcggtgctgg         |
| <i>16S Bacteroidetes</i>  | gtactgagacacggacca       | attaccgcggtgctgg         |
| <i>16S SFB</i>            | gacgctgcggcatgagagcat    | gacggcacggattgtattca     |
| <i>16S A. muciniphila</i> | cagcacgtgaaggtggggac     | ccttgcggttggcttcagat     |

15

16 **Supplemental figures**

17 **Supplemental figure 1**

18 **Supplemental figure 1. Experimental schematic.** Illustration highlighting the overall  
19 methodologies utilized in this study.

20

21 **Supplemental figure 2**

22 **Supplemental figure 2. Genotypic segregation of *Ahr*<sup>-/+</sup> and *Ahr*<sup>-/-</sup> littermates alters**  
23 **the community structure of the cecal microbiota.** Abundance of individual microbiota  
24 phyla within the cecal luminal contents of genotypically segregated littermates (blue *Ahr*<sup>-/+</sup>  
25 <sup>+/+</sup>, red *Ahr*<sup>-/-</sup>) as determined through 16S rDNA gene illumina MiSeq sequencing. Data  
26 represent min-max percentage abundance with median indicated by a horizontal bar ( $n =$   
27  $4/\text{genotype}$ ;  $p < 0.05^*$ ,  $p < 0.01^{**}$  Student's *t*-test).

28

29 **Supplemental figure 3**

30 **Supplemental figure 3. Quantitative analysis of cecal bacterial burden and phyla**  
31 **abundance in genotypically segregated *Ahr*<sup>-/+</sup> and *Ahr*<sup>-/-</sup> littermates.** (a) Real time  
32 PCR quantification of bacterial burden and relative phyla abundance normalized to  
33 eubacteria using phyla-specific primers upon cecal microbial DNA from *Ahr*<sup>-/+</sup> (blue) and  
34 *Ahr*<sup>-/-</sup> (red) mice. (b) Real time PCR quantification of bacterial burden and relative phyla  
35 abundance normalized to eukaryotic *Rpl13a* using phyla-specific primers upon cDNA  
36 generated from total RNA isolated from intact cecal tissue (ceca and luminal contents)  
37 from *Ahr*<sup>-/+</sup> (blue) and *Ahr*<sup>-/-</sup> (red) mice. Data represent mean ( $n = 4/\text{genotype}$ ) 16S

38 rDNA or rRNA gene abundance  $\pm$  SD. Analyses were performed using Student's *t*-test  
39  $p < 0.05^*$ ,  $p < 0.01^{**}$ .

40

#### 41 **Supplemental figure 4**

42 **Supplemental figure 4. Analysis of correlative taxa-level interactions between cecal**

43 **microbiota in genotypically segregated *Ahr*<sup>-/+</sup> and *Ahr*<sup>-/-</sup> mice.** Heat map

44 representations of correlative taxa-level interactions of cecal microbiota from

45 genotypically segregated *Ahr*<sup>-/+</sup> and *Ahr*<sup>-/-</sup> littermates. Data represent Pearson

46 correlation (*r*) coefficients with positive to negative correlation indicated by red to blue,

47 respectively ( $n = 4/\text{genotype}$ ). Correlation coefficients and *p* values are detailed in

48 Supplementary file 1.

49

#### 50 **Supplemental file 1**

51 Excel worksheets containing Pearson correlation coefficients and associated *p* values for

52 taxa-taxa correlations. *Ahr*<sup>-/+</sup> genotype in column A (blue), *Ahr*<sup>-/-</sup> genotype in column A

53 (red). Positive correlations are colored red, negative correlations are colored blue and

54 those correlations with a  $p < 0.05$  are presented in red text.

55

#### 56 **Supplemental file 2**

57 Excel worksheets containing Pearson correlation coefficients and associated *p* values for

58 taxa-cecal metabolite correlations. *Ahr*<sup>-/+</sup> genotype in column A (blue), *Ahr*<sup>-/-</sup> genotype

59 in column A (red). Positive correlations are colored red, negative correlations are colored

60 blue and those correlations with a  $p < 0.05$  are presented in red text.

61 Supplemental figure 1

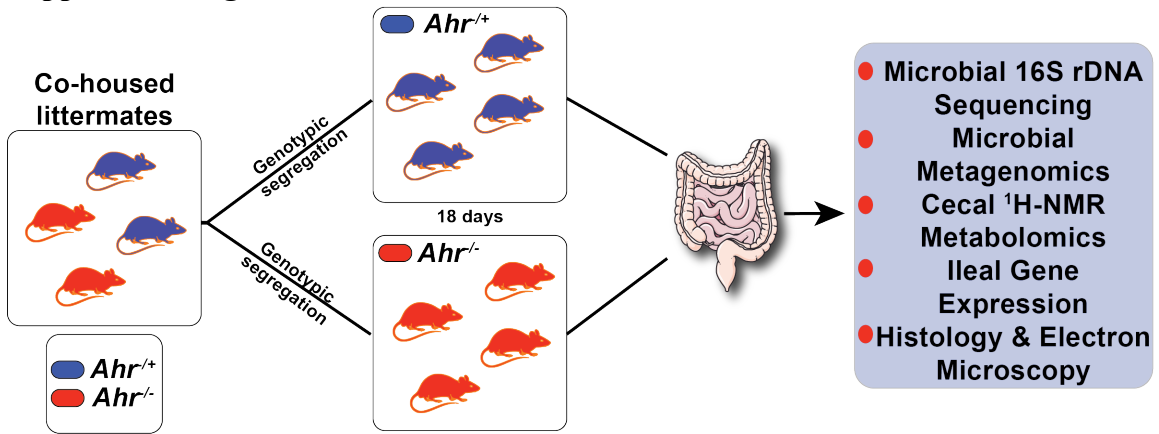

62

63 Supplemental figure 2

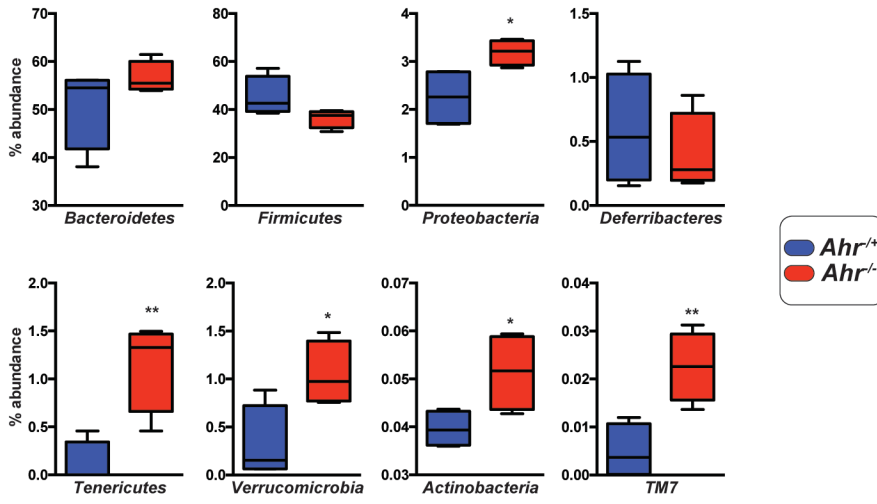

64  
65

66 Supplemental figure 3

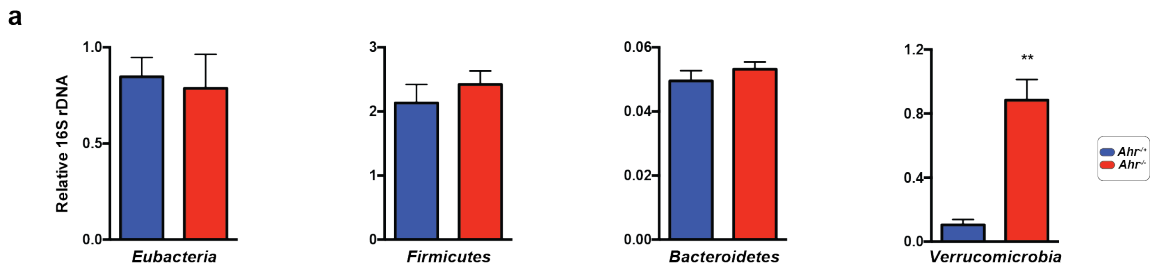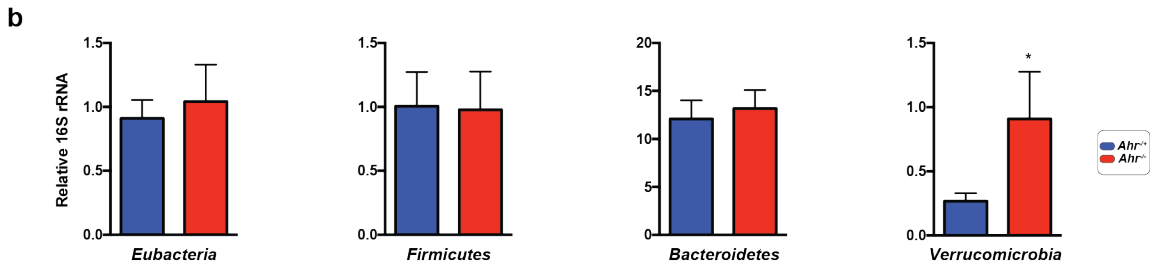

67

68

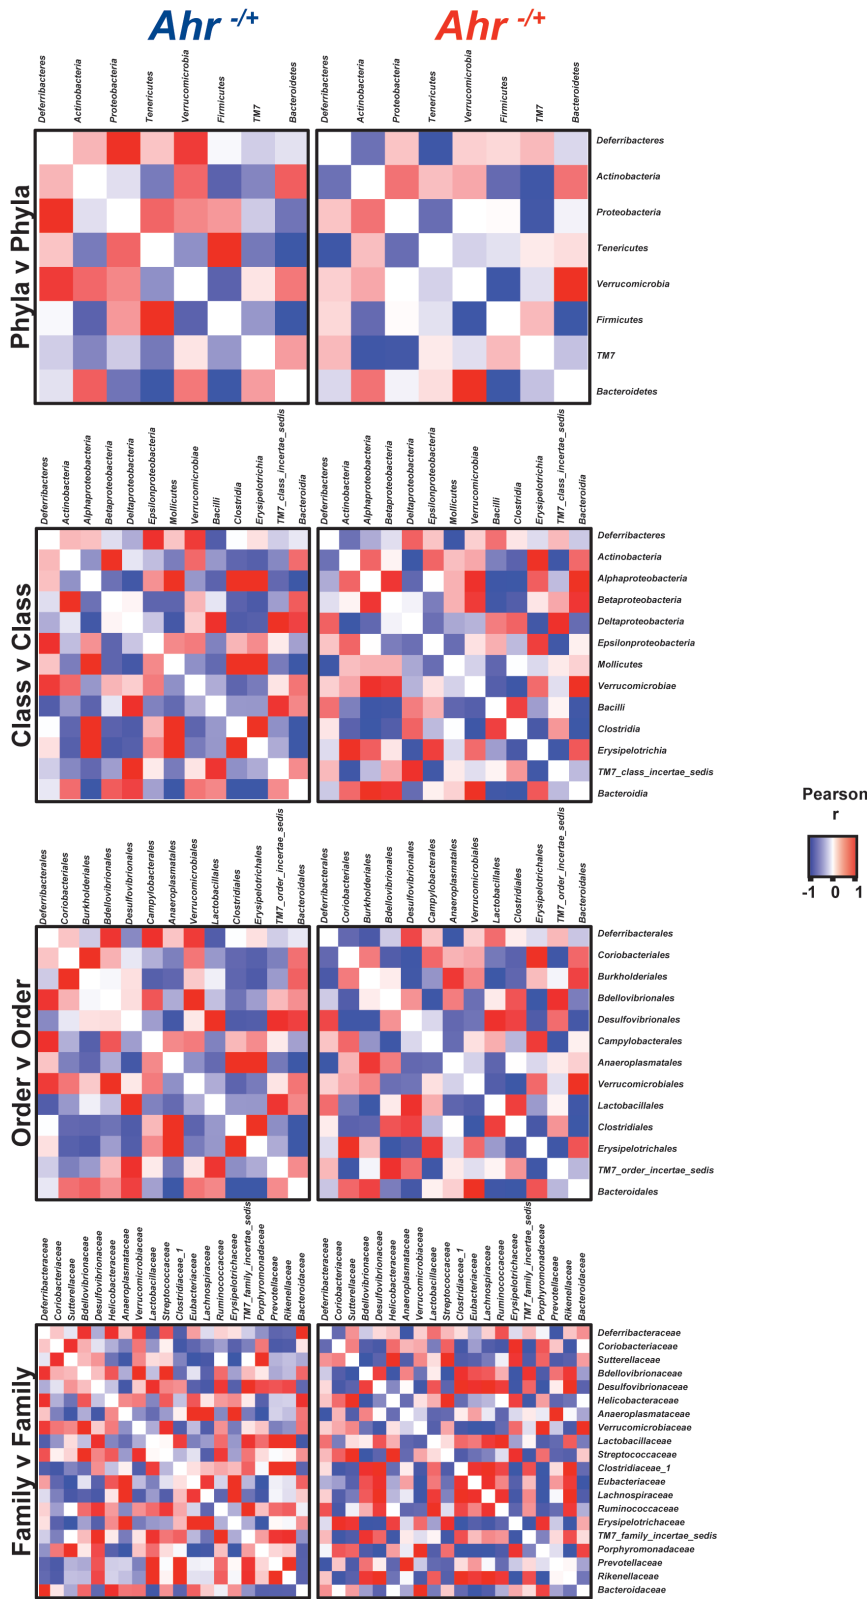



| Ahr -/+                             |                   |                  |                  |               |                   |            |        |                 |
|-------------------------------------|-------------------|------------------|------------------|---------------|-------------------|------------|--------|-----------------|
| Phyla v Phyla Pearson correlation r |                   |                  |                  |               |                   |            |        |                 |
|                                     | "Deferribacteres" | "Actinobacteria" | "Proteobacteria" | "Tenericutes" | "Verrucomicrobia" | Firmicutes | TM7    | "Bacteroidetes" |
| "Deferribacteres"                   |                   | 0.2787           | 0.8973           | 0.2273        | 0.7911            | -0.02782   | -0.196 | -0.1136         |
| "Actinobacteria"                    | 0.2787            |                  | -0.1212          | -0.4919       | 0.588             | -0.6386    | -0.453 | 0.6281          |
| "Proteobacteria"                    | 0.8973            | -0.1212          |                  | 0.5945        | 0.4601            | 0.3896     | -0.205 | -0.5206         |
| "Tenericutes"                       | 0.2273            | -0.4919          | 0.5945           |               | -0.4154           | 0.9639     | -0.502 | -0.9854         |
| "Verrucomicrobia"                   | 0.7911            | 0.588            | 0.4601           | -0.4154       |                   | -0.6329    | 0.1103 | 0.5155          |
| Firmicutes                          | -0.02782          | -0.6386          | 0.3896           | 0.9639        | -0.6329           |            | -0.392 | -0.9889         |
| TM7                                 | -0.1962           | -0.4526          | -0.2053          | -0.5015       | 0.1103            | -0.392     |        | 0.3755          |
| "Bacteroidetes"                     | -0.1136           | 0.6281           | -0.5206          | -0.9854       | 0.5155            | -0.9889    | 0.3755 |                 |

| Ahr -/+                             |                   |                  |                  |               |                   |            |        |                 |
|-------------------------------------|-------------------|------------------|------------------|---------------|-------------------|------------|--------|-----------------|
| Phyla v Phyla Pearson correlation p |                   |                  |                  |               |                   |            |        |                 |
|                                     | "Deferribacteres" | "Actinobacteria" | "Proteobacteria" | "Tenericutes" | "Verrucomicrobia" | Firmicutes | TM7    | "Bacteroidetes" |
| "Deferribacteres"                   |                   | 0.7213           | 0.1027           | 0.7727        | 0.2089            | 0.9722     | 0.8038 | 0.8864          |
| "Actinobacteria"                    | 0.7213            |                  | 0.8788           | 0.5081        | 0.412             | 0.3614     | 0.5474 | 0.3719          |
| "Proteobacteria"                    | 0.1027            | 0.8788           |                  | 0.4055        | 0.5399            | 0.6104     | 0.7947 | 0.4794          |
| "Tenericutes"                       | 0.7727            | 0.5081           | 0.4055           |               | 0.5846            | 0.0361     | 0.4985 | 0.0146          |
| "Verrucomicrobia"                   | 0.2089            | 0.412            | 0.5399           | 0.5846        |                   | 0.3671     | 0.8897 | 0.4845          |
| Firmicutes                          | 0.9722            | 0.3614           | 0.6104           | 0.0361        | 0.3671            |            | 0.608  | 0.0111          |
| TM7                                 | 0.8038            | 0.5474           | 0.7947           | 0.4985        | 0.8897            | 0.608      |        | 0.6245          |
| "Bacteroidetes"                     | 0.8864            | 0.3719           | 0.4794           | 0.0146        | 0.4845            | 0.0111     | 0.6245 |                 |

| Ahr -/-                             |                   |                  |                  |               |                   |            |        |                 |
|-------------------------------------|-------------------|------------------|------------------|---------------|-------------------|------------|--------|-----------------|
| Phyla v Phyla Pearson correlation r |                   |                  |                  |               |                   |            |        |                 |
|                                     | "Deferribacteres" | "Actinobacteria" | "Proteobacteria" | "Tenericutes" | "Verrucomicrobia" | Firmicutes | TM7    | "Bacteroidetes" |
| "Deferribacteres"                   |                   | -0.5413          | 0.2258           | -0.9361       | 0.1845            | 0.1543     | 0.2668 | -0.1568         |
| "Actinobacteria"                    | -0.5413           |                  | 0.5513           | 0.2545        | 0.3398            | -0.5689    | -0.897 | 0.5442          |
| "Proteobacteria"                    | 0.2258            | 0.5513           |                  | -0.5533       | -0.000918         | 0.01703    | -0.855 | -0.05405        |
| "Tenericutes"                       | -0.9361           | 0.2545           | -0.5533          |               | -0.1768           | -0.1185    | 0.0843 | 0.134           |
| "Verrucomicrobia"                   | 0.1845            | 0.3398           | -0.000918        | -0.1768       |                   | -0.9407    | -0.121 | 0.9414          |
| Firmicutes                          | 0.1543            | -0.5689          | 0.01703          | -0.1185       | -0.9407           |            | 0.2711 | -0.9993         |
| TM7                                 | 0.2668            | -0.8969          | -0.8549          | 0.08428       | -0.1212           | 0.2711     |        | -0.2365         |
| "Bacteroidetes"                     | -0.1568           | 0.5442           | -0.05405         | 0.134         | 0.9414            | -0.9993    | -0.237 |                 |

| Ahr -/-                             |                   |                  |                  |               |                   |            |        |                 |
|-------------------------------------|-------------------|------------------|------------------|---------------|-------------------|------------|--------|-----------------|
| Phyla v Phyla Pearson correlation p |                   |                  |                  |               |                   |            |        |                 |
|                                     | "Deferribacteres" | "Actinobacteria" | "Proteobacteria" | "Tenericutes" | "Verrucomicrobia" | Firmicutes | TM7    | "Bacteroidetes" |
| "Deferribacteres"                   |                   | 0.4587           | 0.7742           | 0.0639        | 0.8155            | 0.8457     | 0.7332 | 0.8432          |
| "Actinobacteria"                    | 0.4587            |                  | 0.4487           | 0.7455        | 0.6602            | 0.4311     | 0.1031 | 0.4558          |
| "Proteobacteria"                    | 0.7742            | 0.4487           |                  | 0.4467        | 0.9991            | 0.983      | 0.1451 | 0.946           |
| "Tenericutes"                       | 0.0639            | 0.7455           | 0.4467           |               | 0.8232            | 0.8815     | 0.9157 | 0.866           |
| "Verrucomicrobia"                   | 0.8155            | 0.6602           | 0.9991           | 0.8232        |                   | 0.0593     | 0.8788 | 0.0586          |
| Firmicutes                          | 0.8457            | 0.4311           | 0.983            | 0.8815        | 0.0593            |            | 0.7289 | 0.0007          |
| TM7                                 | 0.7332            | 0.1031           | 0.1451           | 0.9157        | 0.8788            | 0.7289     |        | 0.7635          |
| "Bacteroidetes"                     | 0.8432            | 0.4558           | 0.946            | 0.866         | 0.0586            | 0.0007     | 0.7635 |                 |





Family Family Pearson correlation matrix showing relationships between various bacterial families. The matrix is upper triangular, with the diagonal representing self-correlations (all 1.000). The rows and columns are labeled with family names such as Deferrisphaerae, Coriobacteriales, and Bacillales. The cells contain Pearson correlation coefficients, with red shading indicating positive correlations and white shading indicating negative or zero correlations.

Family Family Pearson correlation matrix showing relationships between various bacterial families. This matrix is more densely populated with values than the first one, indicating a higher density of significant correlations. The layout and labels are consistent with the first matrix.

Family Family Pearson correlation matrix showing relationships between various bacterial families. This matrix shows a different set of correlations compared to the previous two, with many cells appearing white, suggesting a lower density of significant correlations.

Family Family Pearson correlation matrix showing relationships between various bacterial families. This matrix shows a high density of significant correlations, with many cells shaded in red, indicating strong positive relationships between many of the families.

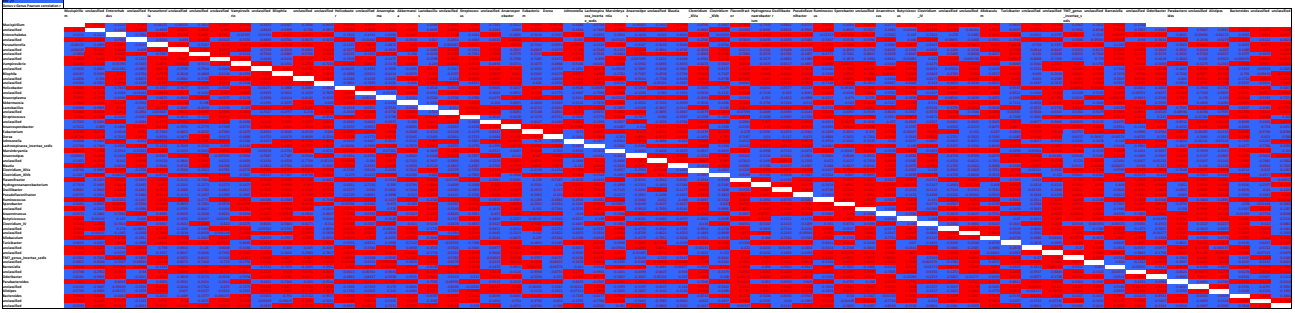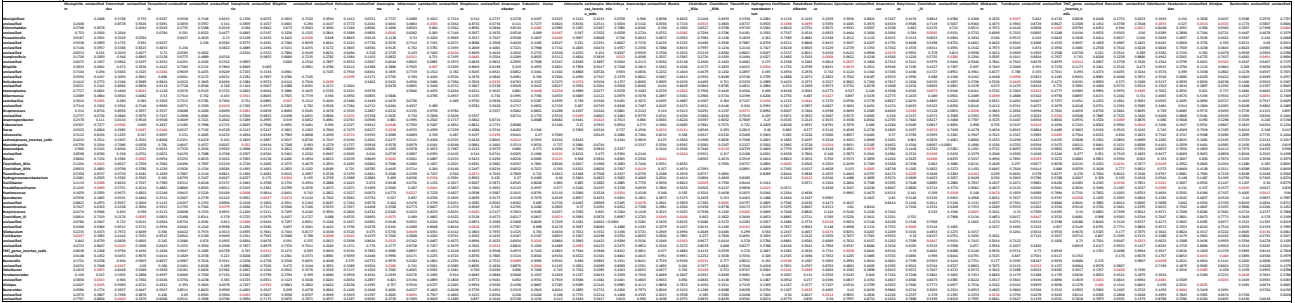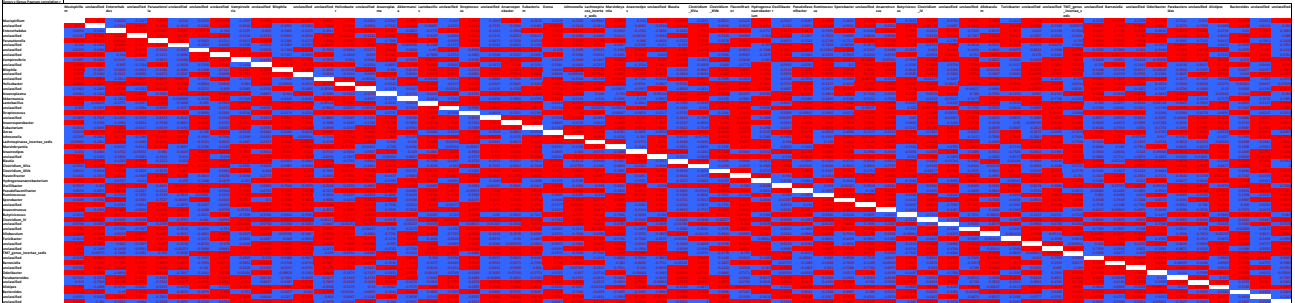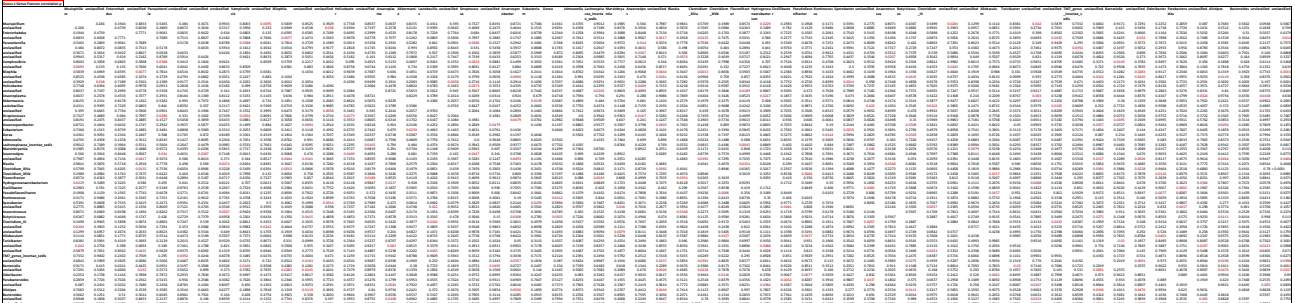

| Ahr -/+                                  |                       |                      |                      |                   |                       |            |          |              |               |
|------------------------------------------|-----------------------|----------------------|----------------------|-------------------|-----------------------|------------|----------|--------------|---------------|
| Phyla v Metabolite Pearson correlation r |                       |                      |                      |                   |                       |            |          |              |               |
|                                          | "Deferribac<br>teres" | "Actinobact<br>eria" | "Proteobact<br>eria" | "Tenericute<br>s" | "Verrucomi<br>crobia" | Firmicutes | TM7      | unclassified | "Bacteroides" |
| cecal butyrate                           | -0.1276               | 0.7912               | -0.5523              | -0.9127           | 0.4636                | -0.9331    | 0.1062   | -0.4008      | 0.9595        |
| cecal propionate                         | 0.14                  | -0.8373              | -0.3105              | -0.8705           | 0.6856                | -0.9554    | 0.1065   | -0.4587      | 0.9413        |
| cecal acetate                            | -0.969                | -0.5069              | -0.7771              | -0.08862          | -0.8543               | 0.1784     | 0.3047   | -0.5754      | -0.04925      |
| cecal baa                                | 0.3779                | 0.6764               | -0.04206             | -0.814            | 0.8652                | -0.9358    | 0.3102   | -0.2819      | 0.8749        |
| cecal lactate                            | 0.2768                | 0.7587               | -0.1641              | -0.8551           | 0.7997                | -0.962     | 0.2275   | -0.3633      | 0.9211        |
| cecal alanine                            | 0.5469                | 0.6907               | 0.1414               | -0.6871           | 0.9439                | -0.852     | 0.2131   | -0.3615      | 0.7693        |
| cecal lysine                             | 0.4778                | 0.4477               | 0.1283               | -0.7196           | 0.8923                | -0.8426    | 0.495    | -0.05885     | 0.7558        |
| cecal glutamate                          | 0.3016                | 0.5298               | 0.2687               | 0.4529            | 0.0188                | 0.3143     | -0.9916  | -0.8774      | -0.3132       |
| cecal tyrosine                           | 0.6465                | 0.7805               | 0.4316               | 0.1283            | 0.5419                | -0.09901   | -0.7746  | -0.9512      | 0.04202       |
| cecal phenylalanine                      | 0.7941                | 0.6869               | 0.4469               | -0.3871           | 0.9887                | -0.6168    | -0.03095 | -0.5173      | 0.5059        |
| cecal glucose                            | -0.1598               | -0.2971              | 0.1611               | 0.8613            | -0.6811               | 0.8941     | -0.7053  | -0.1792      | -0.8454       |
| cecal oligosacc                          | -0.6017               | -0.229               | -0.6849              | -0.7238           | -0.1205               | -0.5413    | 0.8521   | 0.6583       | 0.596         |

| Ahr -/+                                  |                       |                      |                      |                   |                       |            |        |              |               |
|------------------------------------------|-----------------------|----------------------|----------------------|-------------------|-----------------------|------------|--------|--------------|---------------|
| Phyla v Metabolite Pearson correlation p |                       |                      |                      |                   |                       |            |        |              |               |
|                                          | "Deferribac<br>teres" | "Actinobact<br>eria" | "Proteobact<br>eria" | "Tenericute<br>s" | "Verrucomi<br>crobia" | Firmicutes | TM7    | unclassified | "Bacteroides" |
| cecal butyrate                           | 0.8724                | 0.2088               | 0.4477               | 0.0873            | 0.5364                | 0.0669     | 0.8938 | 0.5992       | 0.0405        |
| cecal propionate                         | 0.86                  | 0.1628               | 0.6895               | 0.1295            | 0.3144                | 0.0446     | 0.8935 | 0.5413       | 0.0587        |
| cecal acetate                            | 0.031                 | 0.4931               | 0.2229               | 0.9114            | 0.1457                | 0.8216     | 0.6953 | 0.4246       | 0.9507        |
| cecal baa                                | 0.6221                | 0.3236               | 0.9579               | 0.186             | 0.1348                | 0.0642     | 0.6898 | 0.7181       | 0.1251        |
| cecal lactate                            | 0.7232                | 0.2413               | 0.8359               | 0.1449            | 0.2003                | 0.038      | 0.7725 | 0.6367       | 0.0789        |
| cecal alanine                            | 0.4531                | 0.3093               | 0.8586               | 0.3129            | 0.0561                | 0.148      | 0.7869 | 0.6385       | 0.2307        |
| cecal lysine                             | 0.5222                | 0.5523               | 0.8717               | 0.2804            | 0.1077                | 0.1574     | 0.505  | 0.9412       | 0.2442        |
| cecal glutamate                          | 0.6984                | 0.4702               | 0.7313               | 0.5471            | 0.9812                | 0.6857     | 0.0084 | 0.1226       | 0.6868        |
| cecal tyrosine                           | 0.3535                | 0.2195               | 0.5684               | 0.8717            | 0.4581                | 0.901      | 0.2254 | 0.0488       | 0.958         |
| cecal phenylalanine                      | 0.2059                | 0.3131               | 0.5531               | 0.6129            | 0.0113                | 0.3832     | 0.969  | 0.4827       | 0.4941        |
| cecal glucose                            | 0.8402                | 0.7029               | 0.8389               | 0.1387            | 0.3189                | 0.1059     | 0.2947 | 0.8208       | 0.1546        |
| cecal oligosacc                          | 0.3983                | 0.771                | 0.3151               | 0.2762            | 0.8795                | 0.4587     | 0.1479 | 0.3417       | 0.404         |

| Ahr -/-                                  |                       |                      |                      |                   |                       |            |         |              |               |
|------------------------------------------|-----------------------|----------------------|----------------------|-------------------|-----------------------|------------|---------|--------------|---------------|
| Phyla v Metabolite Pearson correlation r |                       |                      |                      |                   |                       |            |         |              |               |
|                                          | "Deferribac<br>teres" | "Actinobact<br>eria" | "Proteobact<br>eria" | "Tenericute<br>s" | "Verrucomi<br>crobia" | Firmicutes | TM7     | unclassified | "Bacteroides" |
| cecal butyrate                           | -0.7403               | -0.3043              | -0.6262              | 0.8489            | 0.3548                | -0.5793    | 0.1419  | 0.5085       | 0.5986        |
| cecal propionate                         | 0.8501                | -0.2019              | 0.6751               | -0.9665           | -0.0385               | 0.2969     | -0.2009 | -0.2654      | -0.3175       |
| cecal acetate                            | 0.5602                | 0.25                 | 0.9325               | -0.8141           | 0.02859               | 0.1102     | -0.6193 | 0.05626      | -0.1425       |
| cecal baa                                | 0.1826                | 0.6983               | 0.945                | -0.5031           | 0.3127                | -0.3103    | -0.8929 | 0.5333       | 0.275         |
| cecal lactate                            | 0.7258                | -0.1464              | 0.05366              | -0.6532           | 0.8051                | -0.5562    | 0.1538  | 0.3392       | 0.5583        |
| cecal alanine                            | 0.2855                | 0.6212               | 0.6592               | -0.4962           | 0.7513                | -0.6969    | -0.6565 | 0.7666       | 0.673         |
| cecal lysine                             | -0.1823               | 0.924                | 0.7121               | -0.1128           | 0.5288                | -0.6422    | -0.9058 | 0.8498       | 0.6135        |
| cecal glutamate                          | -0.2412               | -0.6549              | -0.9486              | 0.5543            | -0.3139               | 0.2909     | 0.8657  | -0.5025      | -0.2559       |
| cecal tyrosine                           | 0.5151                | 0.128                | 0.8961               | -0.7572           | -0.2407               | 0.3675     | -0.5485 | -0.1764      | -0.3986       |
| cecal phenylalanine                      | 0.3202                | -0.1557              | 0.8641               | -0.5755           | -0.4542               | 0.5153     | -0.5733 | -0.2715      | -0.5463       |
| cecal glucose                            | 0.734                 | -0.9028              | -0.1407              | -0.5648           | -0.4417               | 0.7135     | 0.621   | -0.8704      | -0.7034       |
| cecal oligosacc                          | 0.5201                | -0.9876              | -0.4686              | -0.2637           | -0.473                | 0.6902     | 0.8345  | -0.8999      | -0.6687       |

| Ahr -/-                                  |                       |                      |                      |                   |                       |            |        |              |               |
|------------------------------------------|-----------------------|----------------------|----------------------|-------------------|-----------------------|------------|--------|--------------|---------------|
| Phyla v Metabolite Pearson correlation p |                       |                      |                      |                   |                       |            |        |              |               |
|                                          | "Deferribac<br>teres" | "Actinobact<br>eria" | "Proteobact<br>eria" | "Tenericute<br>s" | "Verrucomi<br>crobia" | Firmicutes | TM7    | unclassified | "Bacteroides" |
| cecal butyrate                           | 0.2597                | 0.6957               | 0.3738               | 0.1511            | 0.6452                | 0.4207     | 0.8581 | 0.4915       | 0.4014        |
| cecal propionate                         | 0.1499                | 0.7981               | 0.3249               | 0.0335            | 0.9615                | 0.7031     | 0.7991 | 0.7346       | 0.6825        |
| cecal acetate                            | 0.4398                | 0.75                 | 0.0675               | 0.1859            | 0.9714                | 0.8898     | 0.3807 | 0.9437       | 0.8575        |
| cecal baa                                | 0.8174                | 0.3017               | 0.055                | 0.4969            | 0.6873                | 0.6897     | 0.1071 | 0.4667       | 0.725         |
| cecal lactate                            | 0.2742                | 0.8536               | 0.9463               | 0.3468            | 0.1949                | 0.4438     | 0.8462 | 0.6608       | 0.4417        |
| cecal alanine                            | 0.7145                | 0.3788               | 0.3408               | 0.5038            | 0.2487                | 0.3031     | 0.3435 | 0.2334       | 0.327         |
| cecal lysine                             | 0.8177                | 0.076                | 0.2879               | 0.8872            | 0.4712                | 0.3578     | 0.0942 | 0.1502       | 0.3865        |
| cecal glutamate                          | 0.7588                | 0.3451               | 0.0514               | 0.4457            | 0.6861                | 0.7091     | 0.1343 | 0.4975       | 0.7441        |
| cecal tyrosine                           | 0.4849                | 0.872                | 0.1039               | 0.2428            | 0.7593                | 0.6325     | 0.4515 | 0.8236       | 0.6014        |
| cecal phenylalanine                      | 0.6798                | 0.8443               | 0.1359               | 0.4245            | 0.5458                | 0.4847     | 0.4267 | 0.7285       | 0.4537        |
| cecal glucose                            | 0.266                 | 0.0972               | 0.8593               | 0.4352            | 0.5583                | 0.2865     | 0.379  | 0.1296       | 0.2966        |
| cecal oligosacc                          | 0.4799                | 0.0124               | 0.5314               | 0.7363            | 0.527                 | 0.3098     | 0.1655 | 0.1001       | 0.3313        |





Ahr -/+

Table with 15 rows and 25 columns showing Pearson correlation coefficients for Ahr -/+ across various bacterial genera.

Ahr -/+

Table with 15 rows and 25 columns showing Pearson correlation coefficients for Ahr -/+ across various bacterial genera.

Ahr -/

Table with 15 rows and 25 columns showing Pearson correlation coefficients for Ahr -/ across various bacterial genera.

Ahr -/

Table with 15 rows and 25 columns showing Pearson correlation coefficients for Ahr -/ across various bacterial genera.

Ahr -/

Table with 15 rows and 25 columns showing Pearson correlation coefficients for Ahr -/ across various bacterial genera.

Ahr +/

Table with 15 rows and 25 columns showing Pearson correlation coefficients for Ahr +/- across various bacterial genera.

Ahr +/-

Table with 15 rows and 25 columns showing Pearson correlation coefficients for Ahr +/- across various bacterial genera.

Ahr +/-

Table with 15 rows and 25 columns showing Pearson correlation coefficients for Ahr +/- across various bacterial genera.



| Family + Metabolic Pearson correlation r |        | Defensin | Combustion | unclassified | Sulfonamide | unclassified | unclassified | Betalactam | unclassified | Desulfonin | unclassified | Holistic | unclassified | Anesthetics | Vercurin | Lactobacilli | Streptococcus | unclassified | Clindamycin | Eubacterin | Lactinon | Romuncoc | unclassified | unclassified | Ergosterol | unclassified | TM7_family | unclassified | Perforin | Prevalence | Bacterin | unclassified | unclassified |
|------------------------------------------|--------|----------|------------|--------------|-------------|--------------|--------------|------------|--------------|------------|--------------|----------|--------------|-------------|----------|--------------|---------------|--------------|-------------|------------|----------|----------|--------------|--------------|------------|--------------|------------|--------------|----------|------------|----------|--------------|--------------|
| rescue                                   | case   | as       | case       | as           | case        | as           | case         | as         | case         | as         | case         | as       | case         | as          | case     | as           | case          | as           | case        | as         | case     | as       | case         | as           | case       | as           | case       | as           | case     | as         | case     | as           |              |
| local hydrolyte                          | 0.8757 | 0.8757   | 0.8757     | 0.8757       | 0.8757      | 0.8757       | 0.8757       | 0.8757     | 0.8757       | 0.8757     | 0.8757       | 0.8757   | 0.8757       | 0.8757      | 0.8757   | 0.8757       | 0.8757        | 0.8757       | 0.8757      | 0.8757     | 0.8757   | 0.8757   | 0.8757       | 0.8757       | 0.8757     | 0.8757       | 0.8757     | 0.8757       | 0.8757   | 0.8757     | 0.8757   | 0.8757       | 0.8757       |

| Family + Metabolic Pearson correlation p |        | Defensin | Combustion | unclassified | Sulfonamide | unclassified | unclassified | Betalactam | unclassified | Desulfonin | unclassified | Holistic | unclassified | Anesthetics | Vercurin | Lactobacilli | Streptococcus | unclassified | Clindamycin | Eubacterin | Lactinon | Romuncoc | unclassified | unclassified | Ergosterol | unclassified | TM7_family | unclassified | Perforin | Prevalence | Bacterin | unclassified | unclassified |
|------------------------------------------|--------|----------|------------|--------------|-------------|--------------|--------------|------------|--------------|------------|--------------|----------|--------------|-------------|----------|--------------|---------------|--------------|-------------|------------|----------|----------|--------------|--------------|------------|--------------|------------|--------------|----------|------------|----------|--------------|--------------|
| rescue                                   | case   | as       | case       | as           | case        | as           | case         | as         | case         | as         | case         | as       | case         | as          | case     | as           | case          | as           | case        | as         | case     | as       | case         | as           | case       | as           | case       | as           | case     | as         | case     | as           | case         |
| local hydrolyte                          | 0.8724 | 0.21     | 0.1051     | 0.0054       | 0.727       | 0.1167       | 0.7157       | 0.0897     | 0.4991       | 0.1795     | 0.473        | 0.8002   | 0.0873       | 0.1564      | 0.7678   | 0.7803       | 0.7271        | 0.6058       | 0.0404      | 0.1883     | 0.9074   | 0.9405   | 0.85         | 0.0212       | 0.138      | 0.8938       | 0.9992     | 0.0099       | 0.7997   | 0.8549     | 0.6174   | 0.4602       | 0.0862       |

| Family + Metabolic Pearson correlation r |        | Defensin | Combustion | unclassified | Sulfonamide | unclassified | unclassified | Betalactam | unclassified | Desulfonin | unclassified | Holistic | unclassified | Anesthetics | Vercurin | Lactobacilli | Streptococcus | unclassified | Clindamycin | Eubacterin | Lactinon | Romuncoc | unclassified | unclassified | Ergosterol | unclassified | TM7_family | unclassified | Perforin | Prevalence | Bacterin | unclassified | unclassified |
|------------------------------------------|--------|----------|------------|--------------|-------------|--------------|--------------|------------|--------------|------------|--------------|----------|--------------|-------------|----------|--------------|---------------|--------------|-------------|------------|----------|----------|--------------|--------------|------------|--------------|------------|--------------|----------|------------|----------|--------------|--------------|
| rescue                                   | case   | as       | case       | as           | case        | as           | case         | as         | case         | as         | case         | as       | case         | as          | case     | as           | case          | as           | case        | as         | case     | as       | case         | as           | case       | as           | case       | as           | case     | as         | case     | as           | case         |
| local hydrolyte                          | 0.8724 | 0.21     | 0.1051     | 0.0054       | 0.727       | 0.1167       | 0.7157       | 0.0897     | 0.4991       | 0.1795     | 0.473        | 0.8002   | 0.0873       | 0.1564      | 0.7678   | 0.7803       | 0.7271        | 0.6058       | 0.0404      | 0.1883     | 0.9074   | 0.9405   | 0.85         | 0.0212       | 0.138      | 0.8938       | 0.9992     | 0.0099       | 0.7997   | 0.8549     | 0.6174   | 0.4602       | 0.0862       |

| Family + Metabolic Pearson correlation p |        | Defensin | Combustion | unclassified | Sulfonamide | unclassified | unclassified | Betalactam | unclassified | Desulfonin | unclassified | Holistic | unclassified | Anesthetics | Vercurin | Lactobacilli | Streptococcus | unclassified | Clindamycin | Eubacterin | Lactinon | Romuncoc | unclassified | unclassified | Ergosterol | unclassified | TM7_family | unclassified | Perforin | Prevalence | Bacterin | unclassified | unclassified |
|------------------------------------------|--------|----------|------------|--------------|-------------|--------------|--------------|------------|--------------|------------|--------------|----------|--------------|-------------|----------|--------------|---------------|--------------|-------------|------------|----------|----------|--------------|--------------|------------|--------------|------------|--------------|----------|------------|----------|--------------|--------------|
| rescue                                   | case   | as       | case       | as           | case        | as           | case         | as         | case         | as         | case         | as       | case         | as          | case     | as           | case          | as           | case        | as         | case     | as       | case         | as           | case       | as           | case       | as           | case     | as         | case     | as           | case         |
| local hydrolyte                          | 0.2597 | 0.6791   | 0.2814     | 0.512        | 0.2235      | 0.318        | 0.725        | 0.3579     | 0.64         | 0.7204     | 0.4154       | 0.5414   | 0.1154       | 0.6452      | 0.0784   | 0.5407       | 0.7972        | 0.7376       | 0.8468      | 0.5009     | 0.1792   | 0.2779   | 0.1494       | 0.9413       | 0.1391     | 0.8581       | 0.4615     | 0.3377       | 0.142    | 0.6607     | 0.7965   | 0.219        | 0.2802       |
